# Supplementary material for: Influencing Factors on Postmortem Protein Degradation for PMI Estimation: A Systematic Review
Source: MDPI journal article supplement (doi:10.3390/diagnostics11071146), 2021-06-23
Supplement: s1 [file s1]

|                                          |                                                                                                                                                                 | Alibegovic et al. 2019 [18] | Foditsch et al. 2016 [19] | Jellinghaus et al. 2018 [20] | Jellinghaus et al. 2019 [21] | Kumar et al. 2016 [22] | Kumar et al. 2016 [23] | Pittner et al. 2016 [12] | Pittner et al. 2020 [24] | Poloz and O'Day 2009 [14] | Wehner et al. 2006 [25] |
|------------------------------------------|-----------------------------------------------------------------------------------------------------------------------------------------------------------------|-----------------------------|---------------------------|------------------------------|------------------------------|------------------------|------------------------|--------------------------|--------------------------|---------------------------|-------------------------|
| Bias arising from study design           | 1.1 Was the sample size chosen adequately (to appropriately address the research hypothesis)? (Y/PY/N/PN/NI)                                                    | N                           | N                         | Y                            | Y                            | N                      | Y                      | Y                        | N                        | PY                        | Y                       |
|                                          | 1.2.1 If Y/PY to 1.1 Were appropriate control samples used that serve as references/comparative values within the outcome analysis domain? (Y/PY/N/PN/NI)       |                             |                           | Y                            | Y                            |                        | PY                     | Y                        |                          | Y                         | Y                       |
|                                          | 1.2.2 If Y/PY to 1.2.1 Was there any effort to reduce risk of bias in selecting an appropriate population fitting into the context of the study? (Y/PY/N/PN/NI) |                             |                           | N                            | N                            |                        | PY                     | Y                        |                          | PY                        | Y                       |
|                                          | Risk of bias judgement                                                                                                                                          | high                        | high                      | moderate                     | moderate                     | high                   | low                    | low                      | high                     | low                       | low                     |
| Bias due to imprecise reporting          | 2.1 Was the study design and outcome reported consistently and unambiguously?                                                                                   | Y                           | Y                         | Y                            | N                            | N                      | Y                      | Y                        | Y                        | Y                         | Y                       |
|                                          | 2.2 Was the sampling (procedure and site) reported comprehensively? (Y/N)                                                                                       | Y                           | Y                         | Y                            | N                            | N                      | N                      | Y                        | Y                        | N                         | Y                       |
|                                          | 2.3 Were influencing factors and/or environmental conditions reported that possibly influence the outcome domain? (Y/N)                                         | Y                           | Y                         | Y                            | N                            | Y                      | N                      | Y                        | Y                        | Y                         | Y                       |
|                                          | 2.4 Were methodical steps reported comprehensively and traceable from sample preparation to data acquisition? (Y/N)                                             | Y                           | Y                         | Y                            | Y                            | Y                      | Y                      | Y                        | Y                        | Y                         | N                       |
|                                          | 2.5 Were details reported regarding the measurement procedure and data analysis that are essential for the outcome domain (endpoint of interest)? (Y/N)         | Y                           | N                         | Y                            | Y                            | N                      | N                      | Y                        | Y                        | Y                         | N                       |
|                                          | Risk of bias judgement                                                                                                                                          | low                         | moderate                  | low                          | high                         | moderate               | high                   | low                      | low                      | moderate                  | high                    |
| Bias due to missing outcome data         | 3.1. Were outcome data available for all, or nearly all, samples used? (Y/PY/N/PN/NI)                                                                           | Y                           | PY                        | Y                            | PY                           | N                      | N                      | Y                        | N                        | Y                         | PN                      |
|                                          | 3.2.1. If N/PN/NI to 3.1 Are the proportions of missing outcome data similar across study groups? (Y/PY/N/PN/NI)                                                |                             |                           |                              |                              | NI                     | Y                      |                          | Y                        |                           | N                       |
|                                          | 3.2.2. If N/PN/NI to 3.1 Are the reasons for (partially) missing outcome data reported? (Y/N)                                                                   |                             |                           |                              |                              | N                      | N                      |                          | Y                        |                           | N                       |
|                                          | 3.2.3. If N/PN/NI to 3.1 Is there evidence that results were robust to the presence of missing outcome data? (Y/NI/N)                                           |                             |                           |                              |                              | N                      | NI                     |                          | NI                       |                           | NI                      |
|                                          | Risk of bias judgement                                                                                                                                          | low                         | low                       | low                          | low                          | high                   | high                   | low                      | moderate                 | low                       | high                    |
| Bias in measurement of the outcome       | 4.1. Were outcome assessors aware of the study group/time point/individual sample data? (Y/PY/NI/N/PN)                                                          | PN                          | NI                        | NI                           | N                            | NI                     | NI                     | NI                       | NI                       | NI                        | NI                      |
|                                          | 4.2. If Y/PY/NI to 4.1 Was the assessment of the outcome likely to be influenced by knowledge of the study group/time point/individual sample data? (Y/PY/N/PN) | PN                          | PY                        | PN                           |                              | PN                     | PN                     | PN                       | PN                       | PN                        | PY                      |
|                                          | Risk of bias judgement                                                                                                                                          | low                         | moderate                  | low                          | low                          | low                    | low                    | low                      | low                      | low                       | moderate                |
| Bias in selection of the reported result | 5.1 Are the reported outcome data likely to have been selected from multiple outcome measurements (methods, time points, conditions, etc.)? (Y/PY/N/PN/NI)      | N                           | PN                        | N                            | PN                           | PY                     | PY                     | N                        | N                        | N                         | N                       |
|                                          | 5.2 Are the reported outcome data likely to have been selected from multiple analyses of the data (values, percentages, ratios)? (Y/PY/N/PN/NI)                 | N                           | N                         | N                            | N                            | N                      | N                      | N                        | N                        | N                         | N                       |
|                                          | Risk of bias judgement                                                                                                                                          | low                         | low                       | low                          | low                          | moderate               | moderate               | low                      | low                      | low                       | low                     |
| Bias arising from multiple use of data   | 6.1 Is there evidence that the same <b>individuals</b> were used in other included studies, published earlier? (Y/PY/N/PN)                                      | N                           | N                         | N                            | N                            | N                      | Y                      | N                        | N                        | N                         | PY                      |
|                                          | 6.2.1 If Y/PY to 6.1 Is there evidence that the same <b>sample</b> material was used in other included studies, published earlier? (Y/PY/N/PN)                  |                             |                           |                              |                              |                        | Y                      |                          |                          |                           | PY                      |
|                                          | 6.2.2 If Y/PY to 6.2.1 Is the multiple use of samples likely to affect meta-analysis? (Y/PY/N/PN)                                                               |                             |                           |                              |                              |                        | N                      |                          |                          |                           | N                       |
|                                          | 6.3 If Y/PY to 6.2.1 Is there evidence that the same <b>data</b> were used in other included studies, published earlier? (Y/PY/N/PN)                            |                             |                           |                              |                              |                        | Y*                     |                          |                          |                           | N                       |
|                                          | Risk of bias judgement                                                                                                                                          | low                         | low                       | low                          | low                          | low                    | low*                   | low                      | low                      | low                       | moderate                |
| Overall bias                             | Risk of bias judgement                                                                                                                                          | high                        | high                      | moderate                     | high                         | high                   | high                   | low                      | high                     | moderate                  | high                    |

\*although evidence exists that the same data were used in other included studies, meta analyses are not affected in this particular study. Because in Kumar et al. 2016 [ ] and Kumar et al. 2016 [ ] different influencing factors were investigated (temperature and cause of death), data are incorporated in separated meta-analyses.
