# Supplementary material for: Influencing Factors on Postmortem Protein Degradation for PMI Estimation: A Systematic Review
Source: MDPI journal article supplement (doi:10.3390/diagnostics11071146), 2021-06-23
Supplement: s1 [file s1]

## RISK OF BIAS JUDGEMENT

| 1.1     | 1.2.1   | 1.2.2   | risk of bias |
|---------|---------|---------|--------------|
| Y/PY    | Y/PY    | Y/PY    | low          |
|         |         | N/PN/NI | moderate     |
|         | N/PN/NI |         | high         |
| N/PN/NI |         |         | high         |

| 2.1 | 2.2 | 2.3 | 2.4  | 2.5  | risk of bias |
|-----|-----|-----|------|------|--------------|
| Y   | Y   | Y   | Y    | Y    | low          |
|     |     |     |      | N    | moderate     |
|     |     |     | N    | Y    | moderate     |
|     |     |     |      | N    | high         |
|     |     | N   | Y    | Y    | moderate     |
|     |     |     |      | N    | high         |
|     |     |     | N    |      | high         |
|     |     |     | N    | Y    | Y            |
|     |     | N   |      | high |              |
|     | N   |     |      | high |              |
|     | N   | Y   | Y    | Y    | moderate     |
| N   |     |     |      | high |              |
| N   |     |     | high |      |              |
| N   |     |     |      |      |              |
|     |     | N   |      |      |              |

| 3.1     | 3.2.1   | 3.2.2 | 3.2.3 | risk of bias |
|---------|---------|-------|-------|--------------|
| Y/PY    |         |       |       | low          |
| N/PN/NI | Y/PY    | Y     | Y     | low          |
|         |         |       | N/NI  | moderate     |
|         |         | N     |       | high         |
|         | N/PN/NI | Y     | Y     | moderate     |
|         |         |       | N/NI  | high         |
|         |         | N     |       | high         |

| 4.1     | 4.2  | risk of bias |
|---------|------|--------------|
| Y/PY/NI | Y/PY | high         |
|         | N/PN | moderate     |
| N/PN    |      | low          |

| 5.1     | 5.2     | risk of bias |
|---------|---------|--------------|
| Y/PY/NI | Y/PY/NI | high         |
|         | N/PN    | moderate     |
| N/PN    | Y/PY/NI | moderate     |
|         | N/PN    | low          |

| 6.1  | 6.2.1 | 6.2.2 | 6.3  | risk of bias |
|------|-------|-------|------|--------------|
| Y/PY | Y/PY  | Y/PY  |      | high         |
|      |       | N/PN  | Y/PY | high         |
|      | N/PN  |       | N/PN | moderate     |
|      |       |       | Y/PY | high         |
|      |       |       | N/PN | moderate     |
|      |       | N/PN  |      |              |

# OVERALL RISK OF BIAS JUDGEMENT

| Bias arising from study design | Bias due to inaccuracy in reporting the method | Bias due to missing outcome data | Bias in measurement of the outcome | Bias in selection of the reported result | Bias arising from multiple use of data | Overall risk of bias |          |
|--------------------------------|------------------------------------------------|----------------------------------|------------------------------------|------------------------------------------|----------------------------------------|----------------------|----------|
| low                            | low                                            | low                              | low                                | low                                      | low                                    | low                  |          |
|                                |                                                |                                  |                                    |                                          | moderate                               | moderate             |          |
|                                |                                                |                                  |                                    |                                          | high                                   | high                 |          |
|                                |                                                |                                  |                                    | moderate                                 | low                                    | moderate             |          |
|                                |                                                |                                  |                                    |                                          | moderate                               | moderate             |          |
|                                |                                                |                                  | high                               |                                          | high                                   |                      |          |
|                                |                                                |                                  | high                               | high                                     |                                        |                      |          |
|                                |                                                |                                  | moderate                           | low                                      | low                                    | moderate             |          |
|                                |                                                |                                  |                                    |                                          | moderate                               | moderate             |          |
|                                |                                                |                                  |                                    |                                          | high                                   | high                 |          |
|                                |                                                | moderate                         |                                    | low                                      | moderate                               |                      |          |
|                                |                                                |                                  |                                    | moderate                                 | moderate                               |                      |          |
|                                |                                                |                                  | high                               | high                                     |                                        |                      |          |
|                                |                                                | high                             | high                               |                                          |                                        |                      |          |
|                                |                                                | moderate                         | low                                | low                                      | low                                    | low                  | moderate |
|                                |                                                |                                  |                                    |                                          |                                        | moderate             | moderate |
|                                |                                                |                                  |                                    |                                          |                                        | high                 | high     |
|                                |                                                |                                  |                                    | moderate                                 | low                                    | moderate             |          |
|                                |                                                |                                  |                                    |                                          | moderate                               | moderate             |          |
|                                |                                                |                                  | high                               | high                                     |                                        |                      |          |
|                                |                                                |                                  | moderate                           | low                                      | low                                    | moderate             |          |
|                                |                                                |                                  |                                    |                                          | moderate                               | moderate             |          |
|                                | high                                           |                                  |                                    |                                          | high                                   |                      |          |
|                                | moderate                                       |                                  |                                    | low                                      | moderate                               |                      |          |
|                                |                                                | moderate                         |                                    | moderate                                 |                                        |                      |          |
|                                | high                                           | high                             |                                    |                                          |                                        |                      |          |
|                                | high                                           | high                             |                                    |                                          |                                        |                      |          |
|                                | moderate                                       | low                              | low                                | low                                      | low                                    | moderate             |          |
|                                |                                                |                                  |                                    |                                          | moderate                               | moderate             |          |
|                                |                                                |                                  |                                    |                                          | high                                   | high                 |          |
|                                |                                                |                                  |                                    | moderate                                 | low                                    | moderate             |          |
|                                |                                                |                                  |                                    |                                          | moderate                               | moderate             |          |
|                                |                                                |                                  |                                    |                                          | high                                   | high                 |          |
|                                |                                                |                                  | moderate                           | low                                      | low                                    | moderate             |          |
|                                |                                                |                                  |                                    |                                          | moderate                               | moderate             |          |
|                                |                                                |                                  |                                    |                                          | high                                   | high                 |          |
|                                |                                                |                                  |                                    | moderate                                 | low                                    | moderate             |          |
|                                |                                                |                                  |                                    |                                          | moderate                               | moderate             |          |
|                                |                                                |                                  |                                    |                                          | high                                   | high                 |          |
|                                |                                                |                                  |                                    |                                          | high                                   | high                 |          |
|                                |                                                |                                  |                                    |                                          | high                                   | high                 |          |
|                                |                                                | moderate                         | low                                | low                                      | low                                    | low                  | moderate |
|                                |                                                |                                  |                                    |                                          |                                        | moderate             | moderate |
|                                |                                                |                                  |                                    |                                          |                                        | high                 | high     |
|                                |                                                |                                  |                                    | moderate                                 | low                                    | moderate             |          |
|                                |                                                |                                  |                                    |                                          | moderate                               | moderate             |          |
|                                |                                                |                                  |                                    |                                          | high                                   | high                 |          |
|                                |                                                |                                  |                                    | moderate                                 | low                                    | low                  | moderate |
|                                |                                                |                                  |                                    |                                          |                                        | moderate             | moderate |
|                                |                                                |                                  |                                    |                                          |                                        | high                 | high     |
|                                |                                                |                                  |                                    |                                          | moderate                               | low                  | moderate |
|                                |                                                |                                  | moderate                           |                                          |                                        | moderate             |          |
|                                |                                                |                                  | high                               | high                                     |                                        |                      |          |
|                                |                                                |                                  | high                               | high                                     |                                        |                      |          |
| high                           |                                                |                                  | moderate                           | moderate                                 | moderate                               | low                  | moderate |
|                                |                                                |                                  |                                    |                                          |                                        | moderate             | moderate |
|                                |                                                |                                  |                                    |                                          |                                        | high                 | high     |
|                                |                                                |                                  |                                    |                                          | high                                   | low                  | moderate |
|                                |                                                |                                  |                                    |                                          |                                        | moderate             | moderate |
|                                | high                                           | high                             |                                    |                                          |                                        |                      |          |
|                                | high                                           | moderate                         |                                    | low                                      | moderate                               |                      |          |
|                                |                                                |                                  |                                    | moderate                                 | moderate                               |                      |          |
|                                |                                                |                                  |                                    | high                                     | high                                   |                      |          |
|                                |                                                | high                             |                                    | low                                      | moderate                               |                      |          |
|                                |                                                |                                  | moderate                           | moderate                                 |                                        |                      |          |
|                                |                                                |                                  | high                               | high                                     |                                        |                      |          |
|                                |                                                |                                  | high                               | high                                     |                                        |                      |          |
|                                |                                                |                                  | high                               | high                                     |                                        |                      |          |

# OVERALL RISK OF BIAS JUDGEMENT

| Bias arising from study design | Bias due to inaccuracy in reporting the method | Bias due to missing outcome data | Bias in measurement of the outcome | Bias in selection of the reported result | Bias arising from multiple use of data | Overall risk of bias |          |      |
|--------------------------------|------------------------------------------------|----------------------------------|------------------------------------|------------------------------------------|----------------------------------------|----------------------|----------|------|
| moderate                       | low                                            | low                              | low                                | low                                      | low                                    | moderate             |          |      |
|                                |                                                |                                  |                                    |                                          | moderate                               | moderate             |          |      |
|                                |                                                |                                  |                                    |                                          | high                                   | high                 |          |      |
|                                |                                                |                                  |                                    | moderate                                 | low                                    | moderate             |          |      |
|                                |                                                |                                  |                                    |                                          | moderate                               | moderate             |          |      |
|                                |                                                |                                  |                                    |                                          | high                                   | high                 |          |      |
|                                |                                                |                                  |                                    | high                                     |                                        |                      |          |      |
|                                |                                                |                                  | moderate                           | low                                      | low                                    | moderate             |          |      |
|                                |                                                |                                  |                                    |                                          | moderate                               | moderate             |          |      |
|                                |                                                |                                  |                                    |                                          | high                                   | high                 |          |      |
|                                |                                                |                                  |                                    | moderate                                 | low                                    | moderate             |          |      |
|                                |                                                |                                  |                                    |                                          | moderate                               | moderate             |          |      |
|                                |                                                |                                  |                                    |                                          | high                                   | high                 |          |      |
|                                |                                                |                                  |                                    | high                                     |                                        |                      |          |      |
|                                |                                                |                                  | high                               |                                          |                                        |                      |          | high |
|                                |                                                | moderate                         | low                                | low                                      | low                                    | moderate             |          |      |
|                                |                                                |                                  |                                    |                                          | moderate                               | moderate             |          |      |
|                                |                                                |                                  |                                    |                                          | high                                   | high                 |          |      |
|                                |                                                |                                  |                                    | moderate                                 | low                                    | moderate             |          |      |
|                                |                                                |                                  |                                    |                                          | moderate                               | moderate             |          |      |
|                                |                                                |                                  |                                    |                                          | high                                   | high                 |          |      |
|                                |                                                |                                  |                                    | high                                     |                                        |                      |          |      |
|                                |                                                |                                  | moderate                           | low                                      | low                                    | moderate             |          |      |
|                                |                                                |                                  |                                    |                                          | moderate                               | moderate             |          |      |
|                                |                                                |                                  |                                    |                                          | high                                   | high                 |          |      |
|                                |                                                |                                  |                                    | moderate                                 | low                                    | moderate             |          |      |
|                                |                                                |                                  |                                    |                                          | moderate                               | moderate             |          |      |
|                                |                                                |                                  |                                    |                                          | high                                   | high                 |          |      |
|                                |                                                |                                  |                                    | high                                     |                                        |                      |          |      |
|                                |                                                |                                  | high                               |                                          |                                        |                      |          | high |
|                                | moderate                                       | low                              | low                                | low                                      | low                                    | moderate             |          |      |
|                                |                                                |                                  |                                    |                                          | moderate                               | moderate             |          |      |
|                                |                                                |                                  |                                    |                                          | high                                   | high                 |          |      |
|                                |                                                |                                  |                                    | moderate                                 | low                                    | moderate             |          |      |
|                                |                                                |                                  |                                    |                                          | moderate                               | moderate             |          |      |
|                                |                                                |                                  |                                    |                                          | high                                   | high                 |          |      |
|                                |                                                |                                  |                                    | high                                     |                                        |                      |          |      |
|                                |                                                |                                  | moderate                           | low                                      | low                                    | moderate             |          |      |
|                                |                                                |                                  |                                    |                                          | moderate                               | moderate             |          |      |
|                                |                                                |                                  |                                    |                                          | high                                   | high                 |          |      |
|                                |                                                |                                  |                                    | moderate                                 | low                                    | moderate             |          |      |
|                                |                                                |                                  |                                    |                                          | moderate                               | moderate             |          |      |
|                                |                                                |                                  |                                    |                                          | high                                   | high                 |          |      |
|                                |                                                |                                  |                                    | high                                     |                                        |                      |          |      |
|                                |                                                |                                  | moderate                           | low                                      | low                                    | low                  | moderate |      |
|                                |                                                | moderate                         |                                    |                                          |                                        | moderate             |          |      |
|                                |                                                | high                             |                                    |                                          |                                        | high                 |          |      |
|                                |                                                | moderate                         |                                    |                                          | low                                    | moderate             |          |      |
|                                |                                                |                                  |                                    |                                          | moderate                               | moderate             |          |      |
|                                |                                                |                                  |                                    |                                          | high                                   | high                 |          |      |
|                                |                                                | high                             |                                    |                                          |                                        |                      |          |      |
|                                |                                                | moderate                         |                                    | low                                      | low                                    | moderate             |          |      |
|                                |                                                |                                  |                                    |                                          | moderate                               | moderate             |          |      |
|                                |                                                |                                  |                                    |                                          | high                                   | high                 |          |      |
|                                |                                                |                                  |                                    | moderate                                 | low                                    | moderate             |          |      |
|                                |                                                |                                  |                                    |                                          | moderate                               | moderate             |          |      |
|                                |                                                |                                  |                                    |                                          | high                                   | high                 |          |      |
|                                |                                                |                                  |                                    | high                                     |                                        |                      |          |      |
|                                |                                                | high                             |                                    |                                          |                                        |                      |          | high |
|                                |                                                | high                             |                                    |                                          |                                        |                      | high     |      |
